# Supplementary material for: Neolithic Yersinia pestis infections in humans and a dog
Source: PubMed Central journal article supplement (PMC11330967; doi:10.1038/s42003-024-06676-7), 2024-08-18
Supplement: 42003_2024_6676_MOESM2_ESM.pdf [file 42003_2024_6676_MOESM2_ESM.pdf]

## Supplemental Information for

### Neolithic *Yersinia pestis* infections in humans and a dog

Julian Susat<sup>1</sup>, Magdalena Haller-Caskie<sup>1</sup>, Joanna H. Bonczarowska<sup>1,2</sup>, Nicolas A. da Silva<sup>1</sup>, Kerstin Schierhold<sup>3</sup>, Michael M. Rind<sup>3</sup>, Ulrich Schmölcke<sup>4</sup>, Wiebke Kirleis<sup>5</sup>, Holger Sondermann<sup>6</sup>, Christoph Rinne<sup>5</sup>, Johannes Müller<sup>5</sup>, Almut Nebel<sup>1</sup>, Ben Krause-Kyora<sup>1</sup>

<sup>1</sup>Institute of Clinical Molecular Biology, Kiel University, Kiel, Germany

<sup>2</sup>Department of Genetics, Yale School of Medicine, New Haven, CT, USA

<sup>3</sup>LWL-Archäologie für Westfalen, Münster, Germany

<sup>4</sup>Centre for Baltic and Scandinavian Archaeology (ZBSA), Schloss Gottorf, Schleswig, Germany

<sup>5</sup>Institute of Pre- and Protohistoric Archaeology, Kiel University, Kiel, Germany

<sup>6</sup>Centre for Structural Systems Biology (CSSB), Deutsches Elektronen-Synchrotron DESY, Hamburg, Germany

\*Correspondence: [b.krause-kyora@ikmb.uni-kiel.de](mailto:b.krause-kyora@ikmb.uni-kiel.de)

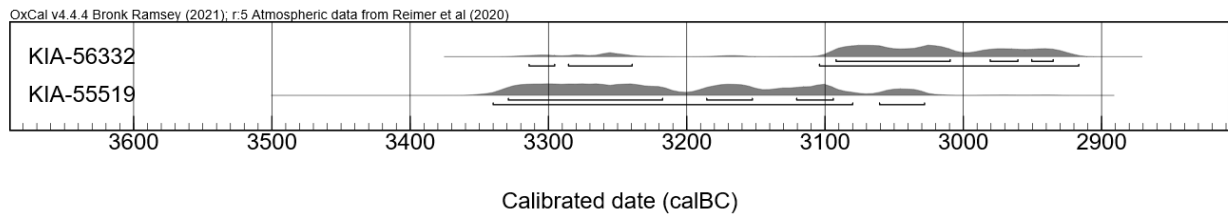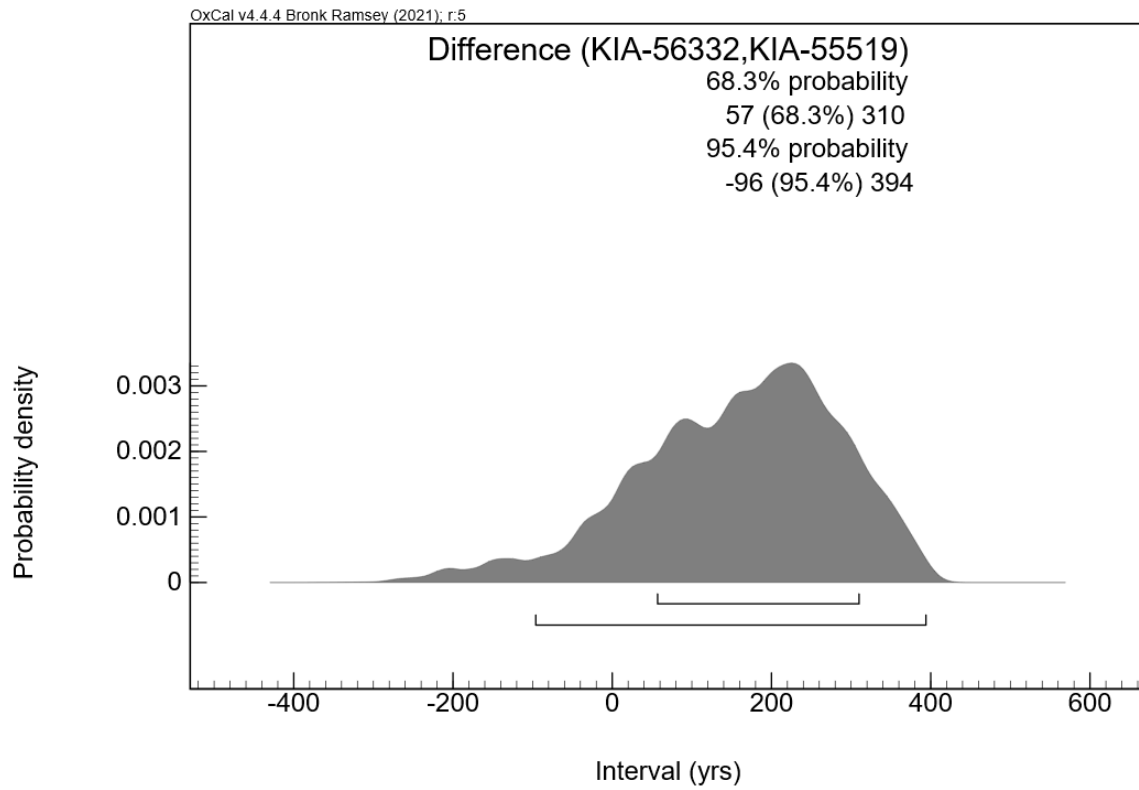

**Supplementary Fig. 1.** Radiocarbon dating results for Warburg\_1 (KIA-55519) and Warburg\_2 (KIA-56332), including the calculation of probability distributions for both samples.

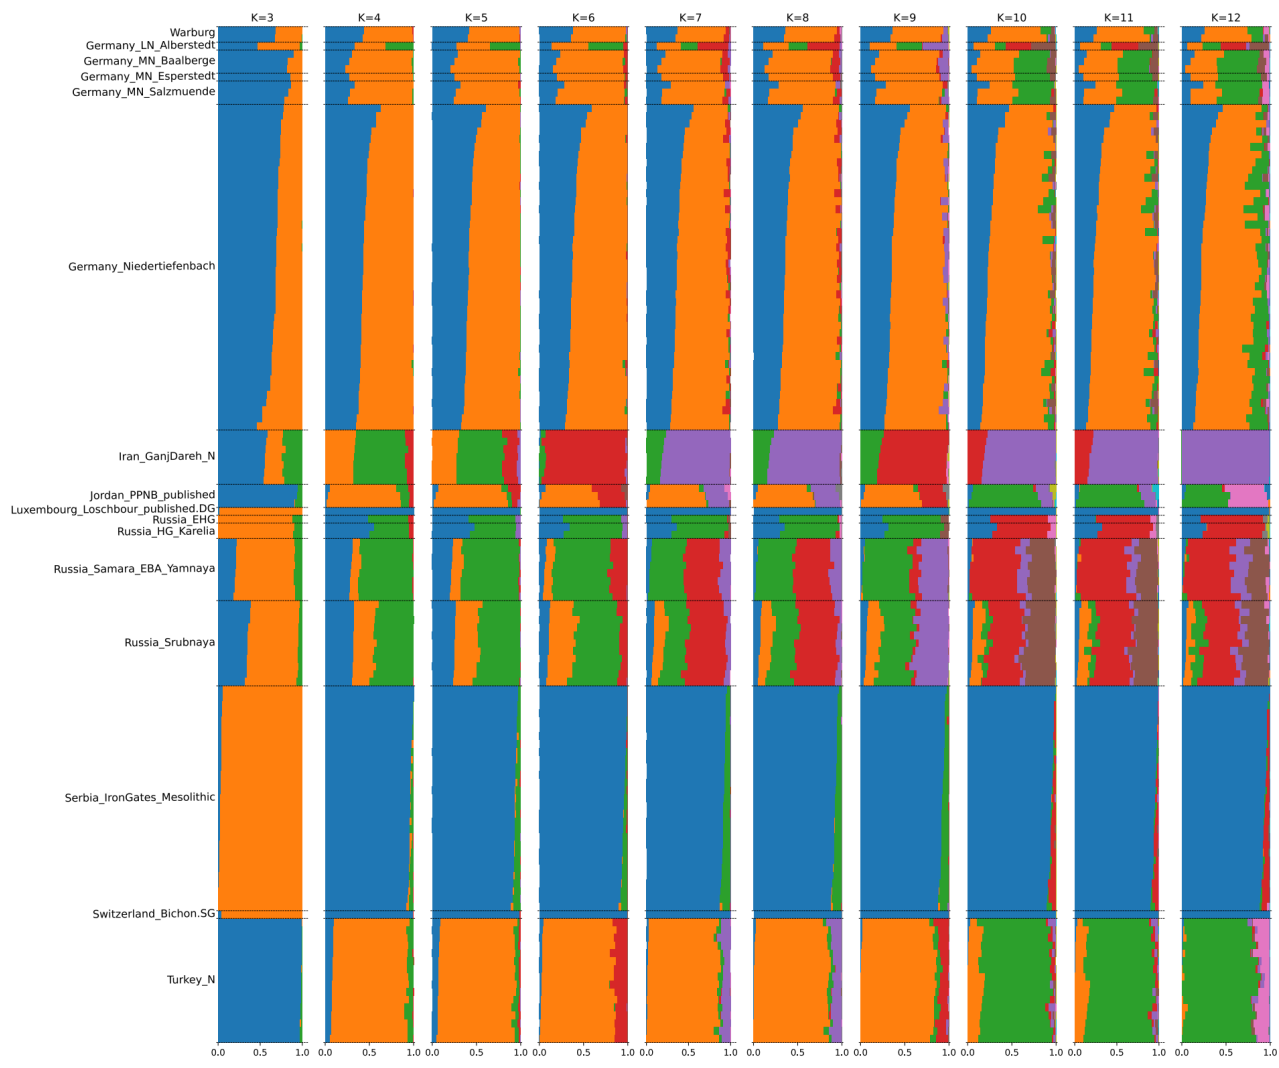

**Supplementary Fig. 2.** Genomic ancestry components using unsupervised ADMIXTURE. For the two Warburg individuals (red), most models indicate two major genetic components: one maximized in Western hunter-gatherers (i.e., Luxembourg\_Loschbour) and the other in Anatolian farmers (i.e., Turkey\_N).

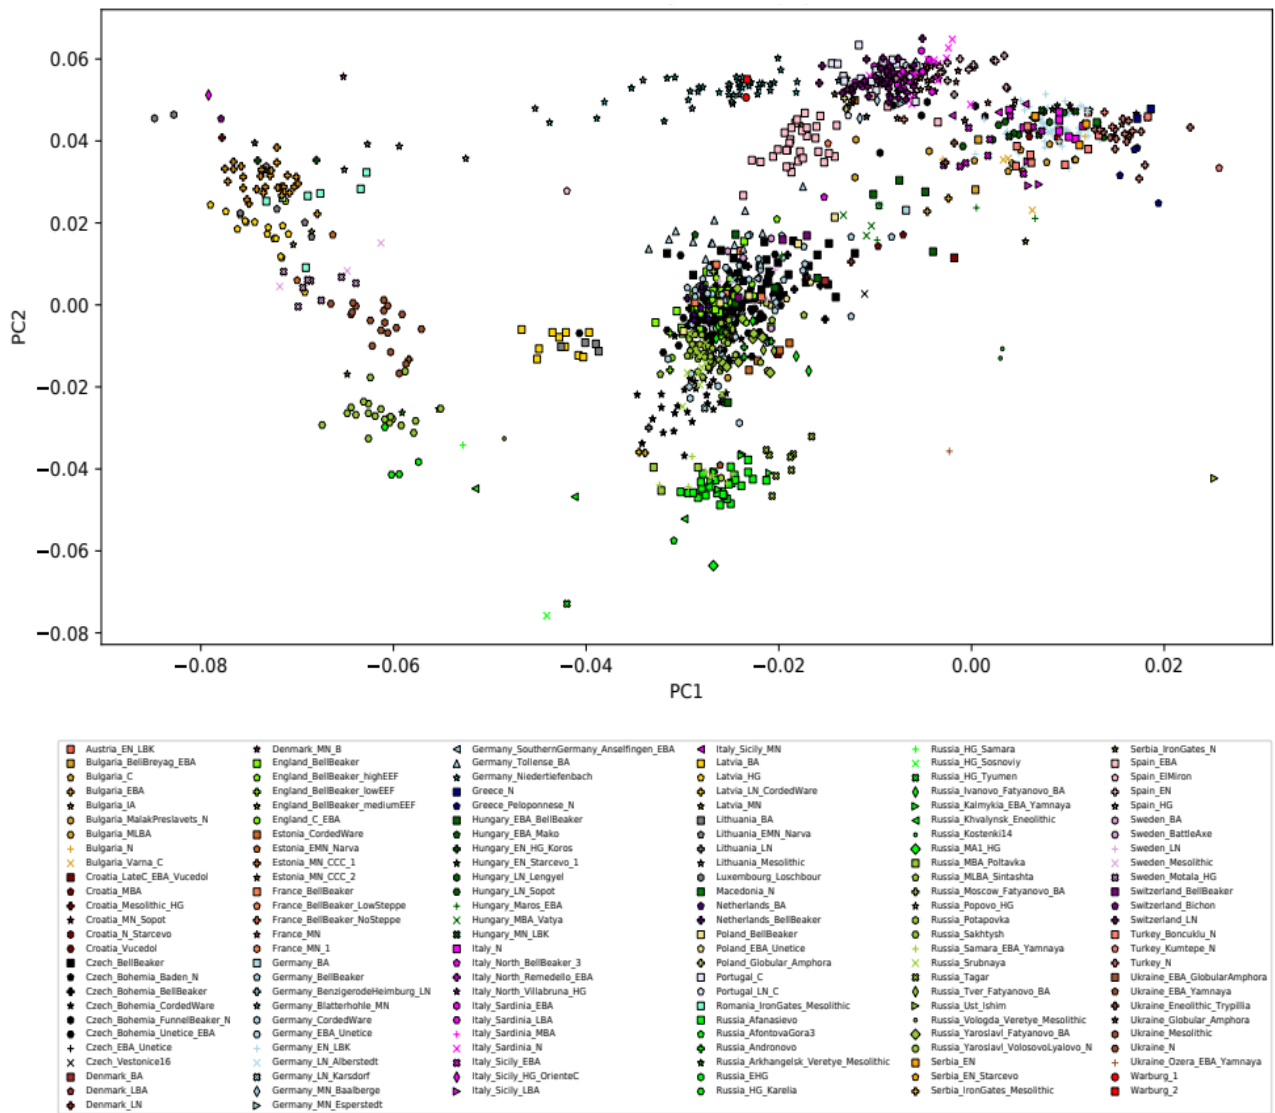

**Supplementary Fig. 3.** Principal component analysis of the individuals Warburg\_1 and Warburg\_2 buried in the WBC gallery graves of Warburg (red) in the context of 150 prehistoric populations, including individuals from the WBC gallery grave of Niedertiefenbach (blue stars).

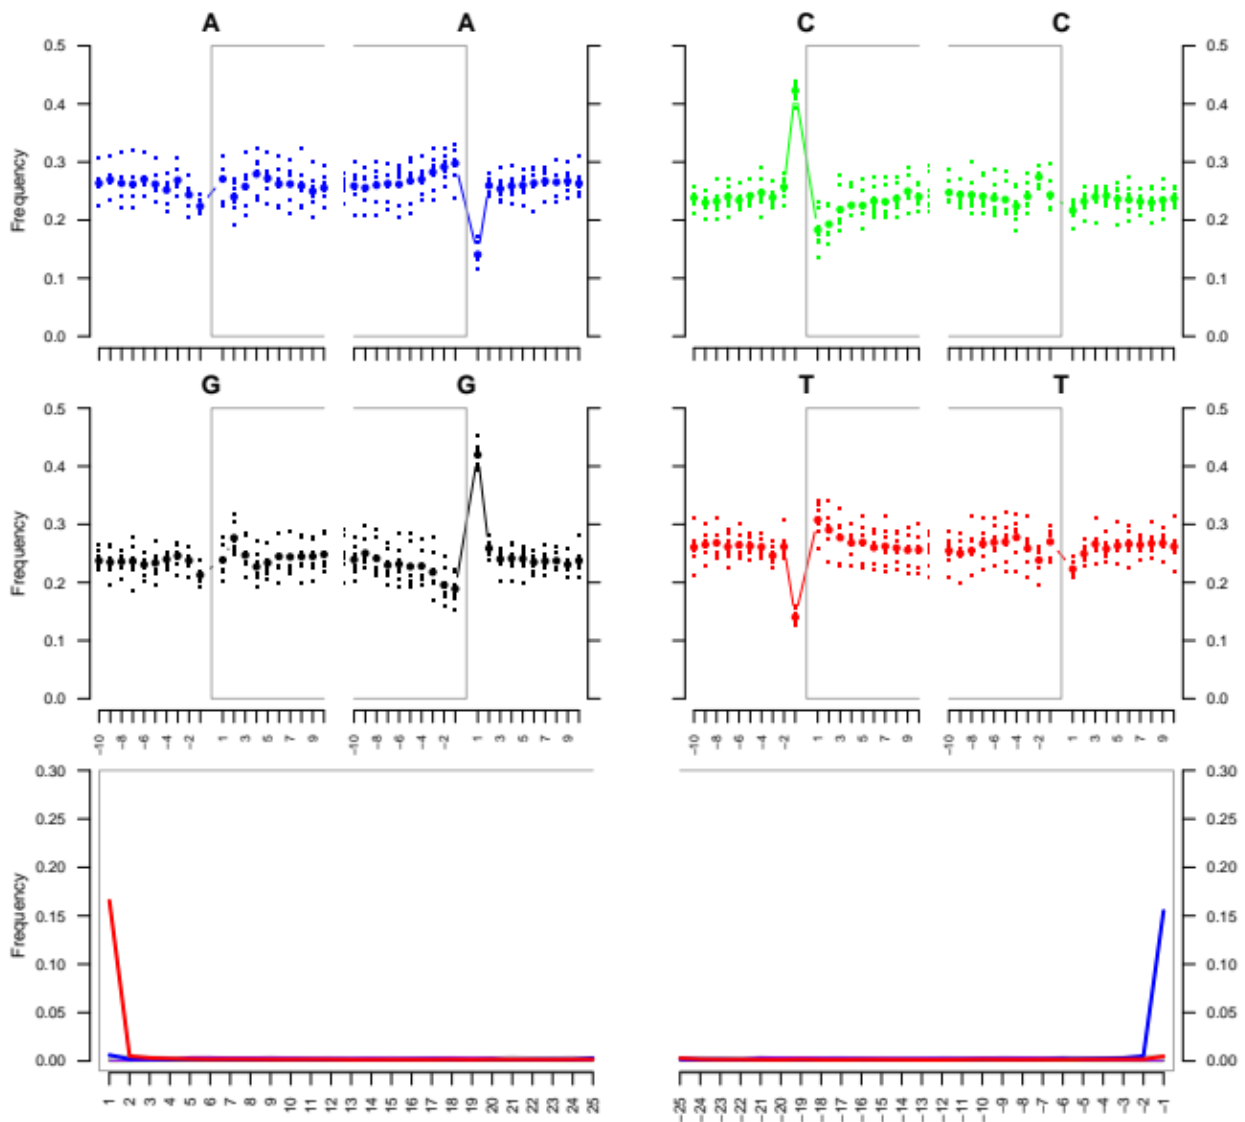

**Supplementary Fig. 4.** Damage plots supporting the ancient origin of *Y. pestis* reads for Warburg\_1.

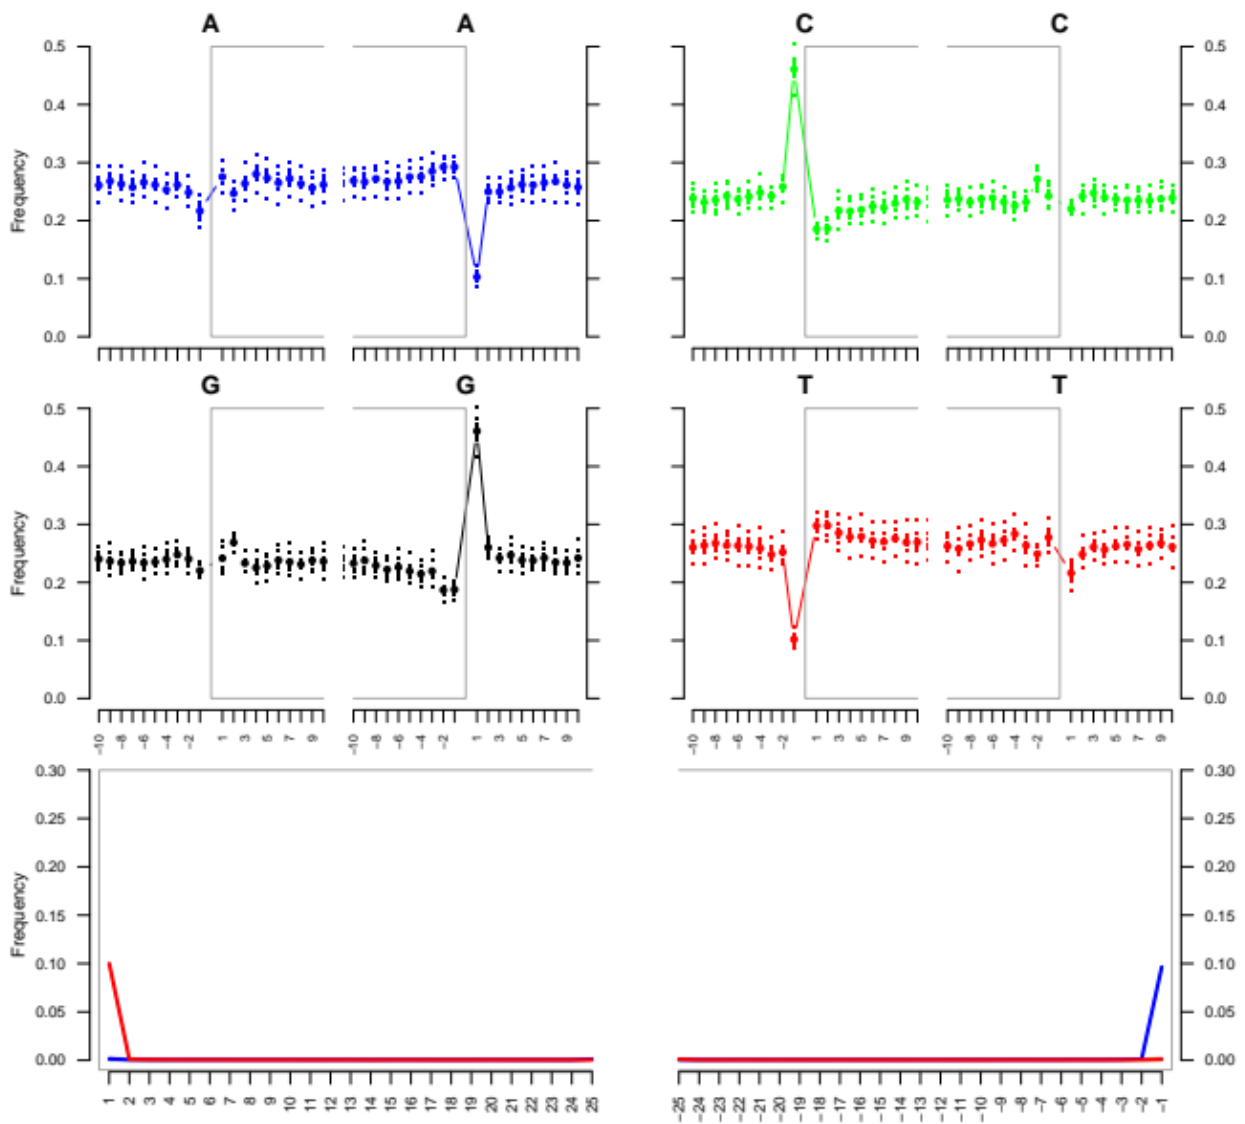

**Supplementary Fig. 5.** Damage plots supporting the ancient origin of *Y. pestis* reads for Warburg\_2.

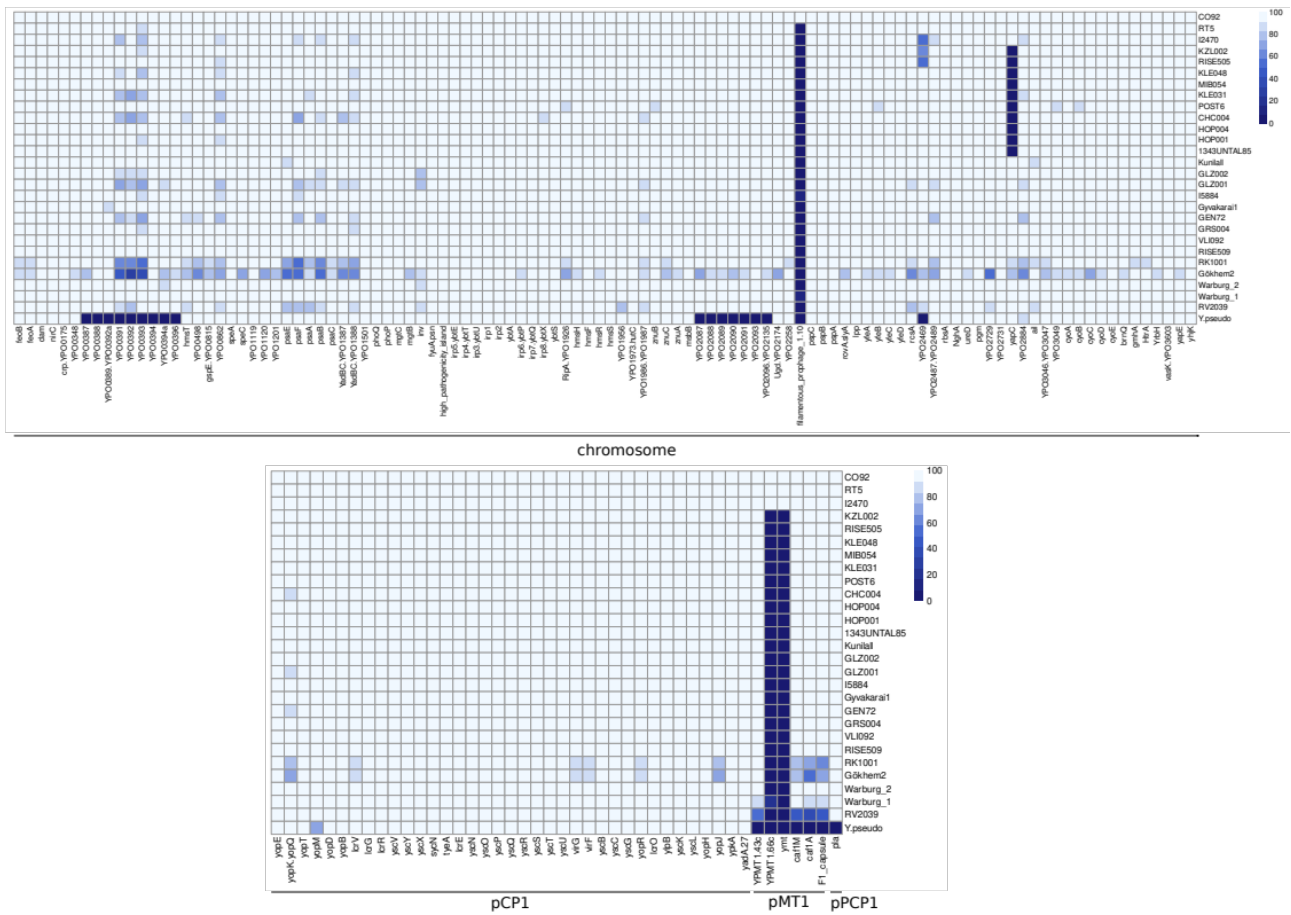

**Supplementary Fig. 6.** Visualization of virulence factors in ancient *Y. pestis* strains. Heatmap shows the presence or absence of 159 virulence factors on the chromosome (n=115) and the plasmids pCD1 (n=37), pMT1 (n=6) and pPCP1 (n=1). Genomes are sorted according to their placement in the phylogenetic tree (Fig. 2).

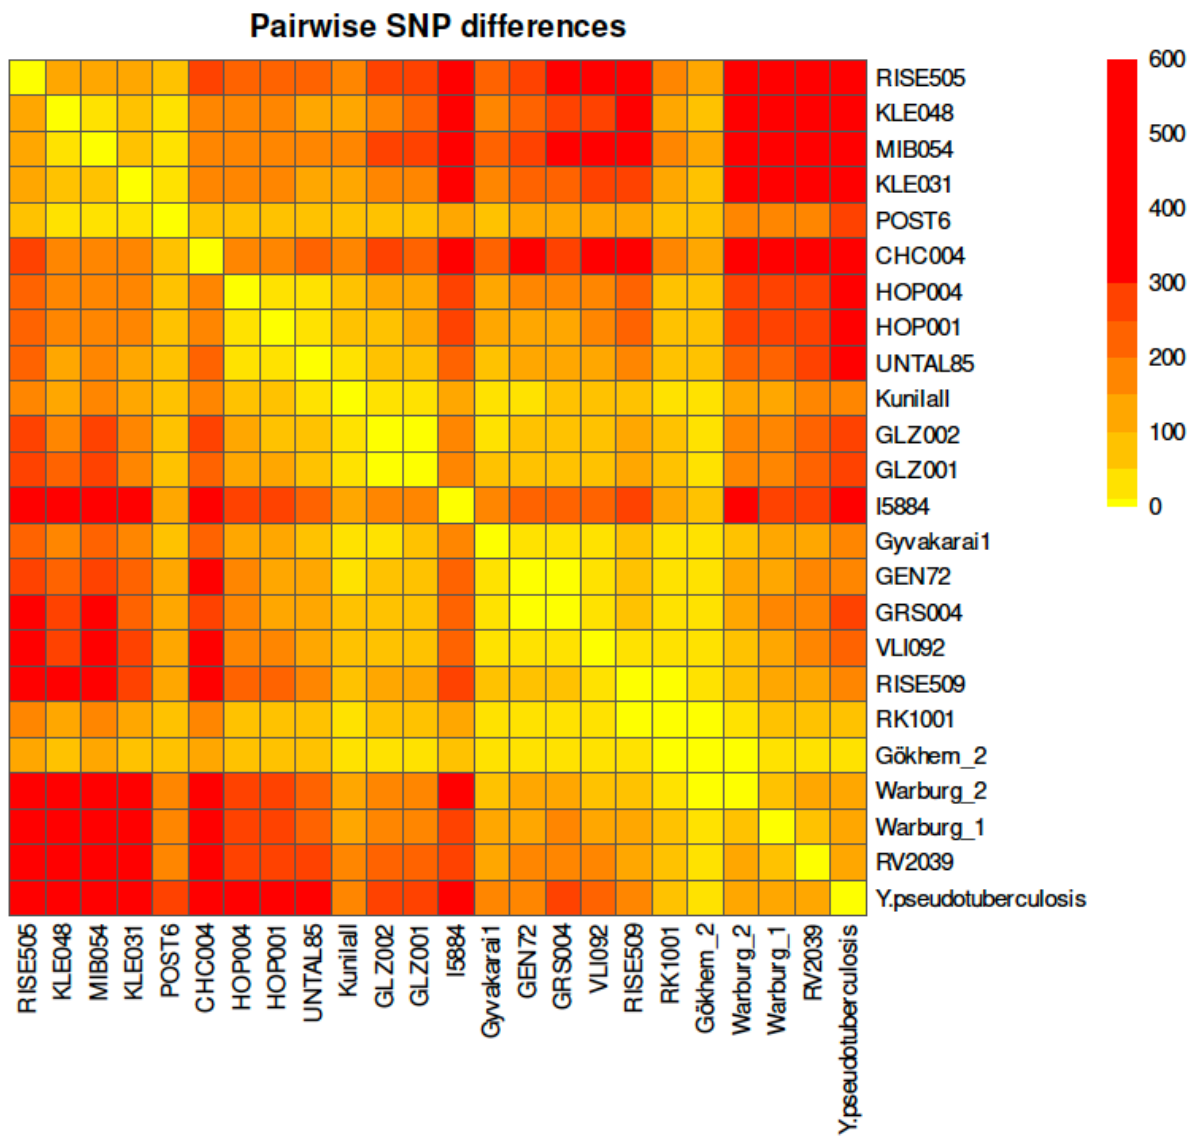

**Supplementary Fig. 7.** SNP distance matrix of LNBA and LN strains based on the Fasta alignments. Variants are counted if supported by a minimal coverage of 4 x.
