# Supplementary material for: Neolithic Yersinia pestis infections in humans and a dog
Source: PubMed Central journal article supplement (PMC11330967; doi:10.1038/s42003-024-06676-7), 2024-08-18
Supplement: 42003_2024_6676_MOESM3_ESM.pdf [file 42003_2024_6676_MOESM3_ESM.pdf]

## Description of Additional Supplementary Files

File: Supplementary Data 1

Description: *Yersinia pestis*-positive Warburg individuals: General information on the sample material and mapping statistics (mapping to *Yersinia pestis* reference genome)

File: Supplementary Data 2

Description: *Yersinia pestis*-positive Warburg individuals: Kinship inference with READ.

File: Supplementary Data 3

Description: *Yersinia pestis*-positive Warburg individuals: Analysis of genomic ancestry components using qpADM. Outgroups used: Mbuti.SDG, Russia\_Ust\_Ishim\_HG\_published.DG, Russia\_Kostenki14, Russia\_MA1\_HG.SG, Han.SDG, Papuan.SDG, ONG.SG, Chukchi.DG, Karitiana.SDG.

File: Supplementary Data 4

Description: Table of nonsense and missense SNPs due to STOP/START codon gain/loss. Only

File: Supplementary Data 5

Description: Number of nucleotide positions differing between the Warburg genomes and those from the LNBA clade and the second pandemic.

File: Supplementary Data 6

Description: 226 modern and 64 ancient strains used in the SNP-based phylogeny, with Y.

File: Supplementary Data 7

Description: Subset of 42 strains used for molecular dating with BEAST2.
